# Supplementary material for: Structure-Functional Analysis of Human Cytochrome P450 2C8 Using Directed Evolution
Source: MDPI journal article supplement (doi:10.3390/pharmaceutics13091429), 2021-09-09
Supplement: s1 [file s1]

## Supplementary Materials: Structure-Functional Analysis of Human Cytochrome P450 2C8 Using Directed Evolution

Rowoon Lee, Vitchan Kim, YoungJin Chun and Donghak Kim

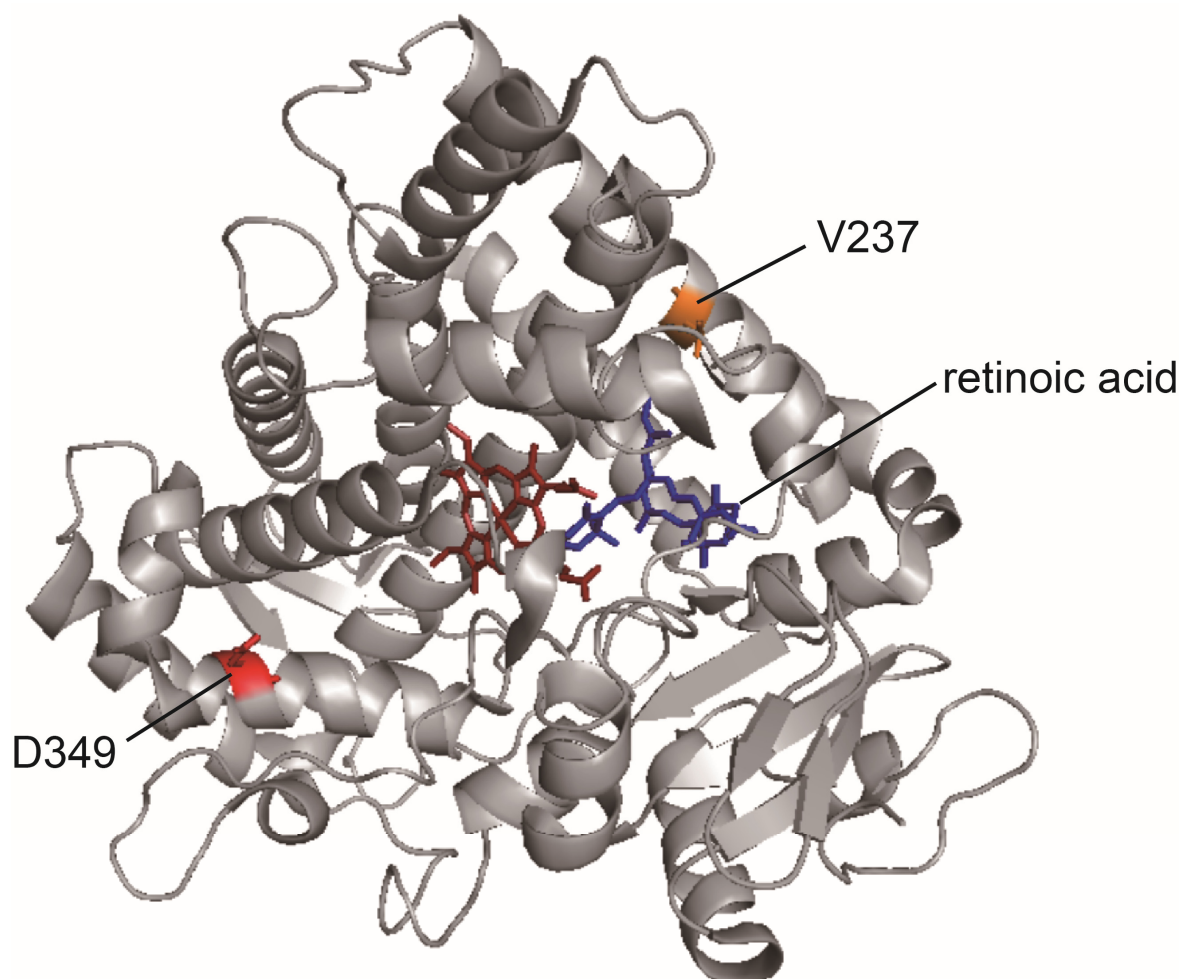

**Figure S1.** Mutated amino acid residues in the active site of CYP2C8. The positions of the D349Y and V237A mutations are indicated by color in the ribbon diagram of the CYP2C8 X-ray crystal structure (PDB entry code: 2NNH). Heme and retinoic acid molecules are shown in red and navy, respectively.
